# Supplementary material
Source: publisher site journal article supplement (https://www.degruyterbrill.com/publication/journal_key/LITY/downloadAsset/LITY_Information_for_Authors.pdf)
Supplement: Supplementary file 1 [file LITY_Information_for_Authors.pdf]

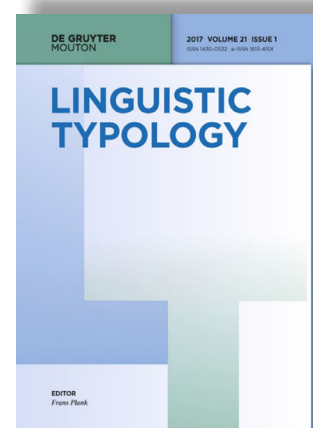

# Linguistic Typology

## Table of Contents

|                                                                         |          |
|-------------------------------------------------------------------------|----------|
| <b>Scope and general policies of the journal</b> .....                  | <b>2</b> |
| Scope.....                                                              | 2        |
| Subscribe to Open.....                                                  | 2        |
| Article (manuscript) categories.....                                    | 2        |
| Data based submissions .....                                            | 2        |
| Special issues and special issue sections.....                          | 2        |
| <b>Submission of manuscripts</b> .....                                  | <b>3</b> |
| ORCID .....                                                             | 3        |
| Submission declaration and verification .....                           | 3        |
| Scientific misconduct .....                                             | 3        |
| Responsible authorship and research integrity.....                      | 3        |
| Research data availability.....                                         | 4        |
| <b>Peer review, turnaround times and pre-publication policies</b> ..... | <b>4</b> |
| Rejection of manuscripts and peer review information.....               | 4        |
| Appeals.....                                                            | 4        |
| Turnaround time .....                                                   | 5        |
| Pre-publication policy .....                                            | 5        |
| Inclusive language policy.....                                          | 5        |
| <b>Post-acceptance</b> .....                                            | <b>5</b> |
| Galley proofs.....                                                      | 5        |
| Issue-based pUblcation .....                                            | 5        |
| Author PDF.....                                                         | 6        |
| Copyright and sharing policy.....                                       | 6        |
| License to Publish .....                                                | 6        |
| Article processing charges (APCs).....                                  | 6        |
| Open access articles on ResearchGate.....                               | 6        |
| <b>Ethical conduct of research</b> .....                                | <b>6</b> |
| Acknowledgments .....                                                   | 6        |
| Author contributions.....                                               | 6        |
| Conflict of interest .....                                              | 7        |
| Research funding.....                                                   | 7        |
| <b>Preparation of manuscript</b> .....                                  | <b>8</b> |
| Title page information .....                                            | 8        |
| Copyediting .....                                                       | 8        |
| General format and manuscript elements.....                             | 8        |
| Abstract.....                                                           | 9        |
| Keywords.....                                                           | 9        |
| Headings .....                                                          | 9        |
| References.....                                                         | 9        |
| Figures and figure captions .....                                       | 9        |
| Tables and table captions .....                                         | 9        |
| Abbreviations.....                                                      | 10       |
| Equations and symbols.....                                              | 10       |
| Linguistic examples.....                                                | 10       |
| Units .....                                                             | 11       |
| Audio and video .....                                                   | 11       |
| Appendices.....                                                         | 11       |
| Supplementary material .....                                            | 11       |
| Book Review Information.....                                            | 11       |

## Scope and general policies of the journal

### Scope

- *Linguistic Typology* provides a forum for all work of relevance to the study of language typology and cross-linguistic variation. It welcomes work taking a typological perspective on all domains of the structure of spoken and signed languages, including historical change, language processing, and sociolinguistics. Diverse descriptive and theoretical frameworks are welcomed so long as they have a clear bearing on the study of cross-linguistic variation. We welcome cross-disciplinary approaches to the study of linguistic diversity, as well as work dealing with just one or a few languages, as long as it is typologically informed and typologically and theoretically relevant, and contains new empirical evidence. *Linguistic Typology* is published by De Gruyter Mouton for the [Association for Linguistic Typology \(ALT\)](#). For membership and subscription details, contact the Secretary: [Dmitry Idiatov](#).
- Three issues per year. The publication language is English.

### Subscribe to Open

Starting in 2024, *Linguistic Typology* will be transferred to open access on a year-by-year basis via Subscribe to Open (S2O). All articles will thus immediately appear under the Creative Commons Attribution [4.0 International License \(CC-BY-4.0\)](#). *There will be no publication costs for the authors.*

Subscribe to Open is a sustainable and equitable approach to transitioning subscription-based journals into open access. It utilizes existing library relationships and subscription processes. Subscribers are offered continued access to their subscribed titles through the standard renewal process. When enough subscriptions are renewed, the journal is moved to open access for that year and the publisher enables unlimited access to all readers and free open access publishing for all authors.

However, if this threshold is not met then the content from the respective year remains behind the paywall. This mechanism serves to ensure the journal's long-term funding and economic sustainability within the realm of open access. The S2O model does not guarantee gold open access. If the S2O target is not met, and your article cannot be published under gold open access, our policies still permit compliance with open access mandates through the alternative green open access pathway. This means you will be able to self-archive the article in an institutional or subject repository in accordance with the respective funder mandates.

The editors of *Linguistic Typology* and the publisher would therefore like to thank all subscribers for their support, which has made the transformation to open access possible. Further information about S2O can be found on our [website](#).

### Article (manuscript) categories

- Research Article
- Target article with peer commentary (if you have an idea for one, contact the Editor)
- Debates (contact the Editor)
- Review articles (reviewing two or more books, or a whole subject area)
- Book reviews (all book reviews are commissioned by Review Editors)
- Methodological contributions (e.g., reports on and reviews of toolkits, databases, software, collection of texts and corpora, archival collections resulting from fieldwork etc.) These should include a discussion of how/why the material is of typological relevance.
- Squibs (very short and often humorous pieces on a very specific topic intended to encourage debate)

### Data based submissions

Authors must make as much as possible of the primary data, analysis scripts, software, databases, etc. freely available in the supplementary materials or in publicly accessible repositories or archives. This is mandatory already at the submission stage since reviewers often require access to this information.

### Special issues and special issue sections

*Linguistic Typology* publishes special and thematic issues focused on important and emerging topics in the field of study. Ideas for special issues are proposed by the journal's editorial board, but the journal will also consider proposals for special issues submitted by members of the wider research community. All proposals are assessed for quality and relevance by the Editor-in-Chief and the editorial office.

The journal has established a rigorous process to ensure that any special issue manuscripts follow the same high-quality standards and peer review processes as regular manuscripts. Each special issue has dedicated Guest Editors who are responsible for the coordination of the peer review process of any manuscripts submitted to the special issue in the online submission system. The Editor-in-Chief or the editorial office check(s) the initial manuscript and assigns it to the appropriate Guest Editor. The Guest Editor invites reviewers and makes recommendations on revisions and final decisions. The Editor-in-Chief has oversight of the entire process within the online submission system and is responsible for the final decision on all manuscripts.

## Submission of manuscripts

- Submit manuscripts exclusively online at: <https://mc.manuscriptcentral.com/lity>

All submissions to *Linguistic Typology* must be strictly anonymised.

We strongly recommend that authors register with institutional email addresses and do not use private email addresses. Institutional email addresses serve as strong authenticity markers. A cover letter must be submitted for each manuscript upon first submission. It should contain a brief statement by the authors as to the element of novelty upon which they base their request for publication in *Linguistic Typology*. Please address the cover letter to the Editor-in-Chief. Revised manuscripts must be accompanied by a point-by-point reply to the reviewers' comments. Major changes in the revised manuscript must be highlighted, preferably in tracked changes mode. A second, clean version should always be submitted for major changes.

## ORCID

ORCID (Open Researcher and Contributor ID) is a non-profit, publisher-independent system that is used to uniquely identify academics and their publications. Detailed information about ORCID can be found at [www.orcid.org/](http://www.orcid.org/). Providing an ORCID number for each author is strongly recommended. ORCID numbers should be listed on the title page.

## Submission declaration and verification

For information on plagiarism, please refer to [COPE – Committee of Publication Ethics](#).

Each manuscript submission declares that the manuscript (or one with substantially the same content, by any of the authors) has not been previously published in any language anywhere and that it is not under simultaneous consideration by any other journal. Exceptions are listed in section “Pre-publication policy”. Furthermore, all co-authors must have agreed to its publication and have given the corresponding author the authority to act on their behalf in all matters pertaining to publication. The corresponding author is responsible for informing the co-authors of the manuscript status throughout the submission, review, and production process.

To exclude potential overlap with prior publication(s), your manuscript is systematically checked by the plagiarism checker Crossref Similarity Check ([iThenticate](#)). Previously published material must be referenced appropriately in the manuscript, regardless of whether the material was previously published in a subscription based, hybrid or open access journal, or in another language.

## Scientific misconduct

Only articles that have not been or will not be published elsewhere will be published in the journal, excluding articles that fall under the publisher's pre-publication policy (see section “Pre-publication policy” below). Multiple submissions/publications or redundant publications (i.e., republication of data already published by the same authors) will be rejected. If identified after publication, the journal reserves the right to publish a retraction note. In any case, editors will follow the [Committee on Publication Ethics](#) (COPE's) Code of Conduct and implement its advice. For detailed information, please see our [publishing ethics page](#).

## Responsible authorship and research integrity

The authors are responsible for all aspects of the study and will ensure that any questions regarding the accuracy and integrity of any part of the work are adequately investigated and resolved.

With submitting your manuscript to *Linguistic Typology* the authors declare that they are the sole and intellectual authors of the manuscript. We do not accept submissions that name Large Language Models, such as ChatGPT,

Artificial Intelligence (AI) and Machine Learning Tools as credited author(s) on a manuscript because such tools cannot take responsibility for the submitted work and therefore cannot be considered as eligible authors. Where such tools or technologies are used as part of the design or methodology of a research study, their use should be clearly described in the Acknowledgments section.

### Research data availability

*Linguistic Typology* requires authors to follow our [Data Sharing Policy](#), which must comply with the European GDPR (*General Data Protection Regulation*) rules.

Research data should be made widely available to the research community to demonstrate the robustness and validity of the research presented in the journal, to enable and encourage replication of the results, and to allow the community with opportunities to learn.

We recommend the use of community-endorsed data types. If you assign a persistent identifier to your research data by archiving it in a data repository, other researchers will be able to cite your data as well as your published research article.

Where possible, data should be submitted to discipline-specific, community-recognized repositories. In cases where there is no appropriate discipline-specific resource, data may be submitted to a general data repository. Please see <https://www.re3data.org/>, <https://fairsharing.org/>, or <https://repositoryfinder.datacite.org/> for help finding research data repositories. We strongly recommend using [CoreTrustSeal](#) certified repositories.

To determine whether a research data availability statement is required and what format it must follow, please refer to the specific files for each policy level available on the [Data Sharing Policy](#) website. Detailed information can be found on the “Submit” tab on the journal website.

We further recommend citing the data that has been shared in the reference list. Data citations should include a persistent identifier, should be included in the reference list using the minimum information recommended by [DataCite](#) (Dataset Creator, Dataset Title, Publisher [repository], Publication Year, Identifier [e.g. DOI, Handle or ARK]) and follow journal style.

## Peer review, turnaround times and pre-publication policies

### Rejection of manuscripts and peer review information

*Linguistic Typology* is a double-anonymized journal. Manuscripts which fulfill the substantive and formal criteria are reviewed anonymously by at least two independent reviewers selected by the Editors. The authors may provide the names, institution, country, and email addresses of potential reviewers.. Authors may also provide names of reviewers they wish to exclude from reviewing their manuscripts.

The following are the categories of rejection or acceptance of manuscripts:

1. DESK REJECT is for work which does not fall within the scope of *Linguistic Typology*, or is not of sufficient quality to send out to review. Studies that are not novel or important enough to merit publication in the journal or manuscripts deemed unsuitable (insufficient originality or limited interest to the target audience) will be also rejected without review. Manuscripts are also returned to authors if they do not comply with the Instructions for Authors.
2. REVISE and RESUBMIT means that the paper needs quite some revision and we cannot guarantee that it will be accepted.
3. ACCEPT with REVISIONS has two versions: MAJOR REVISIONS and MINOR REVISIONS. For MAJOR REVISIONS we send out the manuscript to external reviewers again, preferably the same as for the original submission. For MINOR REVISIONS the paper may go out to external review again or it may be dealt with by internal reviewing.
4. REJECT (the paper has been rejected on the basis of external reviews and will not be further processed).

All the decisions are made jointly by the Editorial Board. The final decision is therefore not an average of the suggestions by the peer reviewers, but is based on the peer reviews, on the responsible editor's report and the discussion among the editors.

### Appeals

Manuscripts that have been rejected for publication will be reconsidered only at the discretion of the Editor(s). Authors wishing to request reconsideration of a previously rejected manuscript must do so in written form and submit a rebuttal by email to the journal's editorial office. Authors should provide detailed reasons why they be-

lieve the manuscript should be reconsidered. If the rebuttal is accepted, the author will be asked to re-submit the manuscript, or the decision will be reversed.

### Turnaround time

*Linguistic Typology* aspires to inform authors of the peer review decision within 8-10 weeks from the submission date. Revised manuscripts with MINOR MODIFICATIONS should be returned within 30 days. Manuscripts with MAJOR MODIFICATIONS should be returned after 3 months. If the decision is REVISE and RESUBMIT, a new manuscript has to be submitted within 6 months.

### Pre-publication policy

The publisher does not consider the following purposes of a paper as pre-publication: publication in the form of a congress abstract, publication as an academic thesis, publication as an electronic preprint on recognized servers such as arXiv, RePEc, bioRxiv, ResearchSquare, etc.

### Inclusive language policy

Inclusive language recognizes diversity, conveys respect for all people, is sensitive to differences and promotes equal opportunities. Content should not make assumptions about readers' beliefs or commitments; should not contain anything that might suggest that one person is superior to another because of age, gender, race, ethnicity, culture, sexual orientation, disability or health condition; and should use inclusive language throughout. Authors should ensure that their writing is free from prejudice, stereotypes, slang, references to the dominant culture and/or cultural assumptions.

We advise the following approach: Aim for gender neutrality by using plural nouns (clinicians, clients, participants) as standard and avoiding "he" or "she", wherever possible. Instead, please use "they". We recommend avoiding the use of descriptors that refer to personal characteristics such as age, gender, race, ethnicity, culture, sexual orientation, disability or health status unless they are relevant and valid.

### Post-acceptance

#### Galley proofs

Once the manuscript is accepted for publication, it is forwarded to typesetting. The corresponding author receives the galley proofs in electronic form to check them for editing and typesetting accuracy. Corresponding authors receive an email notification by [noreply@degruyter.com](mailto:noreply@degruyter.com), subject: "Check your proof pdf: [journal abbreviation]-xxxx-xxxx" (please carefully check your email inbox as well as your spam folder) with a link to the online proofreading system (Proof Central) through which they can access their galley proofs. The interface is similar to MS Word: authors can edit the text by entering their corrections directly, adding comments, and answering questions from the copy editor. If preferred, authors can also annotate and upload edits to the PDF version. All instructions for proof corrections, including deadlines, will be given in the email notification to the corresponding author, along with a user guide, providing step-by-step instructions for inserting corrections.

Substantial changes to a manuscript accepted for publication will only be considered with the permission of the Editor or after additional peer review. The responsibility for proofreading lies solely with the authors. Please note that the editor reviews the corrections/edits communicated by the authors and reserves the right to make changes.

**According to the publisher's policy, once a manuscript has been accepted, no changes to the author list and manuscript title are allowed (except typos). The publisher's production team is instructed to enforce this policy during the production/proof correction process.**

### Issue-based publication

Articles are first published online as DOI citable articles and later assigned to an issue with final page numbers.



## Author PDF

Electronic files of typeset articles in Adobe Acrobat PDF format are provided free of charge. The corresponding author will receive an email notification when the article has been published online along with instructions on how to access the article.

## Copyright and sharing policy

All open access publications are published under a [Creative Commons license](#). The Creative Commons licenses specify the extent to which the work can be re-used by the scientific community and the general public. Publishing under a Creative Commons license means that the authors retain the copyright, and the publisher receives non-exclusive exploitation rights. The permitted reuse of gold open access articles by third parties is determined by the usage license. Articles in *Linguistic Typology* are published under the Creative Commons Attribution [4.0 International License \(CC-BY-4.0\)](#). The Creative Commons license is specified in the [License to Publish](#). Please read our [Open Access Policies](#) for detailed information.

## License to Publish

The [License to Publish](#) can be downloaded from the journal's website. It must be completed and supplied when submitting a manuscript.

## Article processing charges (APCs)

When enough subscriptions are renewed, the journal is moved to open access for that year with free open access publishing for all authors. There will be no article processing charges for the authors.

## Open access articles on ResearchGate

The publisher partners with ResearchGate to deposit the Version of Record of all our gold open access articles with ResearchGate. If you have a profile on ResearchGate and you have published your article open access, it will automatically appear in your profile on publication. For more information about ResearchGate and setting up a profile visit [What is my Profile? – ResearchGate](#).

## Ethical conduct of research

**Manuscripts must follow certain ethical guidelines** to be considered for publication, which can be found in the [Publication Ethics and Malpractice Statement](#). Accordingly, **before submitting your manuscript, please make sure that you and your co-authors agree to the applicable requirements**. For example, this may involve declaring and ruling out conflicts of interest or proving compliance with legal requirements related to human and animal testing.

Furthermore, our [Code of Conduct for Publication Procedures and Ethics](#) defines the responsibility of the publisher and the Editors we work with, to ensure the legitimacy and quality of our published research. Our principles are based on the guidelines of the [Committee on Publication Ethics \(COPE\)](#).

## Acknowledgments

Authors may wish to acknowledge individuals, working groups, institutions, etc. who provided help and support (other than financial) during research and the preparation of the manuscript (e.g., language checking, writing assistance or proof reading of the article, etc.). Individuals acknowledged are not included on the title page, as a footnote to the title or otherwise.

Acknowledgements should be given on the title page.

## Author contributions

In view of research integrity, authorship is generally confined to an individual who has made a substantial intellectual or practical contribution to the conception or design of the project or the acquisition, analysis, or interpretation of data for the work of a publication and/or has drafted the work or reviewed/revised it critically for

important intellectual content. The individual(s) listed as author(s) must agree to be accountable for said contribution and approve of the final version. **Honorary authorship is not allowed.**

Individuals who helped or participated in certain substantive aspects of the project or work (e.g., technical services staff), but whose contributions were not of sufficient extent to be listed as co-authors, should be appropriately acknowledged, usually in an Acknowledgements section.

We do not accept submissions that name Large Language Models, such as ChatGPT, Artificial Intelligence (AI) and Machine Learning Tools as credited author(s) on a manuscript because such tools cannot take responsibility for the submitted work and therefore cannot be considered as eligible authors.

Authors must declare their responsibility for the entire content of the manuscript and may indicate the individual contributions of each author, if applicable. The information on author contributions should be given on the title page.

### Conflict of interest

A conflict of interest for a particular manuscript exists when a participant in the peer review and publication process – author, reviewer, and editor – has ties to activities that could inappropriately influence their judgment, regardless of whether the judgment is actually affected. Financial relationships with industry (for example, employment, consultancies, stock ownership, honoraria, patent applications, expert testimony, grants, and other funding), either directly or through immediate family, are usually considered the most important conflicts of interest. However, conflicts can occur for other reasons, such as financial support of the study, ties to health insurance, politics or other stakeholders, personal relationships, academic competition, and intellectual passion.

To ensure fair and objective decision-making, authors must declare any associations that pose a conflict of interest (financial, personal, or professional) in connection with the manuscript under evaluation.

The conflict-of-interest statement should be given on the title page.

### Research funding

Funding sources should be given at the end of the manuscript, before the References. When the study benefitted from funding through an unrestricted grant or other resources provided to a university, college, other research institution, or an individual author, state the name of the institute or organization that provided the funding along with the grant number, if applicable.

If no funding was provided for the research, the default statement will be set in place: *None declared.*

## Preparation of manuscript

### Title page information

Please provide a title page as a separate file during the submission process including the following information:

- Author names

Write at least one given or one middle name and the family name in full. For all other names, initials are sufficient. List authors in the order you want them to appear in the final version. Indicate the corresponding author by using an asterisk "\*" after the family name. **Please include an IPA transcription of all authors' names.** Only one author can be designated as corresponding author. Please use author footnotes to further distinguish authorship.

Kindly use the wording provided in the [Contributor Role Taxonomy](#), e.g.

[Full name author A] was responsible for: Conceptualization (Equal) and Funding acquisition (Lead), whereas [Full name author B] was responsible for: Conceptualisation (Equal) and Writing (original draft) (Lead).

If you include the name of a group or consortium in your author list, please clearly identify the group members. Please note that as per the publisher's policy, no author list changes are permitted after acceptance of a manuscript.

- Title and short title

Provide a descriptive, concise and comprehensible main title as well as an abbreviated form of the main title (running head) with no more than 50 characters (including blanks). The short title will be displayed on the top of each page of the final version.

The article title and subtitle should be in sentence case. Use lowercase letters after colon.

- Affiliations

For the corresponding author supply the following details: email address, department, institution, street, city, postal code and country; for all other authors department, institution, city, postal code and country are mandatory. Please also provide all details concerning the current institutional affiliation in case you changed affiliation during the manuscript preparation and publication process.

Supplying an ORCID is highly recommended (for more information and registration, please visit the [ORCID web-page](#)).

- Please also indicate the word count, number of tables and figures, and whether your manuscript contains supplementary material.

### Copyediting

The publisher provides copyediting of manuscripts. Copyediting includes ensuring the consistency of dates, lists, figure and table captions, in-text citation; the consistency of headlines and footnotes; the consistency in reference style; checking the text for completeness concerning references, cross-references and footnotes; editing grammar, punctuation and ensuring consistent treatment of terms (spelling, grammar, style); checking the quality of figures; and checking examples for style and consistency. The copyeditor will contact the corresponding author directly during this process.

All manuscripts must be written in clear and concise English. Please use British or American English consistently.

### General format and manuscript elements

The word limit for research papers is 15,000 words maximum, including examples, tables and references. Authors submitting with LaTeX, be aware not all methods for counting words in LaTeX documents include examples, tables and references by default. Please make sure you include these in your word count. If your paper is much longer than this, consider an online Appendix with data or other supporting materials. We recommend that authors include ISO/Glottolog codes for all languages mentioned, in brackets after the first mention. **Please include your tables and figures both in the manuscript text and in separate files.**



**Abstract**

Give a concise summary of your article in an abstract of max. 100-200 words in a single paragraph. As abstracts are published separately by abstracting and indexing services, please spell out abbreviations at first use and do not include footnotes, tables, figures or equations. Avoid using references. If it is essential to use a reference in the abstract, please expand it as per journal reference style.

**Keywords**

Keywords are used by abstracting and indexing services as well as search engines to facilitate finding your paper. Together with the title and abstract of your paper, they are a key tool enabling readers to find your paper and for increasing citations.

Supply 3–6 specific keywords in lower case, separated by semicolon.

These can be single words, but also short phrases representing the content. Make sure to select precise and concise keywords to your field or sub-field of research. Avoid jargon, abbreviations, and special characters.

**Headings**

Your manuscript should be subdivided into sections (and, if necessary, subsections). These sections should be labeled with headings in a consistent format and with a clear hierarchy of section headings. Limit your subsections to a maximum of four levels. For subdivided sections ensure that they have at least two subheadings on one level. Headings do not have an end period.

Headings should be numbered and in sentence case. Use lowercase letters after colon.

**References**

Please adhere strictly to the reference style of *Linguistic Typology* as outlined in the [Mouton Journal Stylesheet](#). The style sheet provides examples for different types of citations in the text as well as for different bibliographic items in the reference list. Please note: All references mentioned in the reference list must be mentioned in the text, and vice versa.

**Figures and figure captions**

Graphs, line drawings, photographs, schemes, diagrams, etc. may be used to illustrate your findings. Publication of color figures is provided free of charge in both online and print editions. The publication quality always depends directly on the quality and size of the delivered data.

Please label the illustrations as “Figure”. Each figure should be uploaded separately as .jpg, .eps, .png or .tiff file. Images should have a minimum resolution of 300 dpi (color or black-white pixel graphics/half-tone images) in the intended size (600dpi combination of pixel graphic and line drawing, 1200dpi for line drawings). When drawing bar graphs, use patterning/color instead of grey scales (faint shading may be lost upon reproduction). Figures should not display any frames.

Figures should be numbered consecutively using Arabic numerals (from 1) throughout the text. If you include multi-part figures, please make sure to label all part figures by using uppercase letters. Please make sure that all figures are explicitly referred to in the text. Do not end the text immediately preceding the suggested positioning of a figure with a colon and avoid expressions such as “in Figure 1 below/above”, as the exact positioning of these elements cannot be determined until after the manuscript has been typeset. Note that figures will usually be placed on the top or the bottom of the page in the final layout.

Provide a concise and self-explanatory caption for each figure. In case of multi-part figures, please include a main caption as well as part figure captions.

The key to the symbols depicted in the figures should be included in the figure itself, where possible. Otherwise, include it in the caption. The caption itself should not be included in the figure.

Please make sure that letters, numbers, symbols, text, etc. included in the figure are clear, easy to read (not below 6pt, preferably in Arial or Helvetica) and uniform in style.

It is the authors' responsibility to use images that do not infringe on any copyrights, performing rights, trademark rights, personal rights or any other third-party rights or are otherwise unlawful. Copyright permissions can be obtained through the Copyright Clearance Center (<https://www.copyright.com/>).

**Tables and table captions**

Number tables consecutively using Arabic numerals. Tables should be provided in an editable source format (Word, LaTeX). Please avoid handing in tables as image or Excel files.

Provide a short descriptive title, column heads, and (if necessary) footnotes to make each table self-explanatory. In column heads, separate units with a comma and use parentheses or square brackets for additional measures

(e.g., %, range, etc.). Use footnotes in alphabetical order (a, b, c, etc.) to give emphasis or further information. Expand abbreviations used in tables in footnotes.

In case bold type or italics are used to highlight information, please explain their meaning.

Avoid color, shading, vertical lines, and other cell borders. Note that most horizontal lines within the table body will be removed during the production process.

Indicate where to place the table approximately (e.g., [Place Table 1 near here]). Do not end the text immediately preceding the suggested positioning of a table with a colon and avoid expressions such as “in Table 1 below/above”, as the exact positioning of these elements cannot be determined until after the manuscript has been typeset. Note that tables will usually be placed on the top or the bottom of the page in the final layout.

### Abbreviations

The use of abbreviations and acronyms is permitted given that they are expanded in full when used the first time with the abbreviation in parentheses (applies to abstract and main text). Please use them consistently thereafter. Avoid using non-standard abbreviations unless they appear more than three times in the text. We recommend providing a list with an overview of all abbreviations.

### Equations and symbols

Equations should be well-aligned and not crowded. Use only Latin and Greek alphabets. Avoid complicated superscripts and subscripts by introducing new symbols. Avoid repetition of a complicated expression by representing it with a symbol. For MS Word submissions create equations using the Microsoft equation editor or a corresponding add-on. Do not submit math equations as images, but as editable text. Number displayed equations consecutively with Arabic numerals (if referred to in the text).

### Linguistic examples

Keep the use of italic and bold font type, underlining and background color in tables to a minimum and make only use of it when absolutely necessary to draw attention to a particular linguistic feature that cannot be highlighted otherwise.

Linguistic examples with interlinear glossing should follow the “Leipzig glossing rules” (<http://www.eva.mpg.de/lingua/resources/glossing-rules.php>). Align glosses using tables preferably or tabs. Do NOT use space bars. The example source should be listed on a new line left-aligned with the example text. Examples in English should be set in italics.

References to examples in the text should take the form “see (2a) and (2b)” with both number and letter in brackets.

(Please see below for an example on how to format a linguistic example.)

- (1) *qwél-em*                      *te*                      *Strang*                      *te*                      *sth'ôqwl.*  
barbecue-INTR                      DET                      Strang                      DET                      fish  
'Strang barbecues the fish.'  
(Wiltschko 2006: 202)

- (2) a. *bawid*                      *lagahk*                      *lođ.*  
I.saw                      SELF                      me  
'I saw myself.'  
(Gast and Siemund 2006: 355)
- b. *lagahk*                      *Juan*                      *kayuhn-ni*                      *rolihdz-ni.*  
SELF                      Juan                      Is.building-3SG                      house-3SG.POSS  
'Juan himself is building his house.'  
(Gast and Siemund 2006: 355)
- c. *Juan*                      *ensilaani*                      *kayuhn-ni*                      *rolihdz-ni.*  
Juan                      SELF.AO                      Is.building-3SG                      house-3SG.POSS  
'Juan is building his house himself.'  
(Gast and Siemund 2006: 355)

- (3) *I sent the artefacts to an anthropologist.*

## Units

Use SI units. For more information, please visit <https://www.bipm.org/en/home>

## Audio and video

For all examples connected to an audio/video recording, supply audio/video clips. Deliver these clips as separate files and do not integrate them directly into the manuscript.

Name all your clips using the following convention:

e.g., audio-1-smith.MP3, video-1-smith.MP4,

[media]-[identifier]-[author-family-name].[extension]

Indicate the position in the article by placing a marker as follows:

[associated audio-1-smith.wav with example (1)]

Provide a short caption for each media file and number them consecutively. Any other media files can be included as part of the supplementary material.

File naming: audiosupplement-1-smith.MP3,

[media.supplement]-[identifier]-[author-family-name].[extension]

The following formats are preferred: audio files in MP3 (at least 16 bit) and video files in MP4 (at least a height of 480 pixels and a frame rate of 25). However, other common formats are also permitted.

## Appendices

Use appendices for information that supports your findings but is not essential for the understanding of your paper (e.g., lengthy mathematical proofs, tables, graphics, etc.). Cite appendices within the main text. Tables and figures in the appendix should be numbered consecutively as follows: Figure A.1, Table A.1, Figure A.2, Table A.2, etc. The appendix is placed at the end of the main text before the reference list.

## Supplementary material

Supplementary material which may offer further information on your work but does not belong to the core part of the article, will not be part of the typeset article PDF. The material will be made available as a separate download in the online version of the article. Supplementary material may contain questionnaires for discussed surveys, protocols, code samples, datasets, extensive tables, additional figures, multimedia files (audio, video, animations), etc. If the manuscript is accepted, supplementary material will be referenced in the print version, but will be published online only.

Please provide supplementary material data as separate file(s) of no more than 10 MB per file during submission. Note that the material should be publication-ready (not in track-changes mode), as it will not be typeset, but published exactly as supplied. Within the text, the supplementary material must be cited consecutively and be referred to as supplementary material data (e.g., see Supplementary Material, Fig. 1, or Figure S1, Table S1, etc.).

## Book Review Information

Authors of book reviews should follow the above guidelines with the following adjustments:

- The word limit for book reviews is 4–5,000 words including references.
- Book reviews do not include a title; instead, please include full details of the book(s) reviewed, followed by your name.
- Do not include an abstract or keywords.
- Book/grammar review authors are not to consult with the editors or authors of the book(s) under review.

## For any further questions please contact:

Maria Koptjevskaja Tamm (Editor)

[lt@degruyter.com](mailto:lt@degruyter.com)

Angela Terrill (Assistant Managing Editor)

[punctilious.editing@gmail.com](mailto:punctilious.editing@gmail.com)
